# Supplementary material for: [Sr4Cl2][Si3S9]: Ultrawide-bandgap salt-inclusion thiosilicate nonlinear optical material with unprecedented tri-polymerized [Si3S9] clusters
Source: Royal Society of Chemistry journal article supplement (doi:10.1039/d3tc00154g), 2023-01-01
Supplement: d3tc00154g1.pdf [file d3tc00154g1.pdf]

**[Sr<sub>4</sub>Cl<sub>2</sub>][Si<sub>3</sub>S<sub>9</sub>]: Ultrawide-bandgap salt-inclusion thiosilicate nonlinear optical material with unprecedented tri-polymerized [Si<sub>3</sub>S<sub>9</sub>] clusters**

Chenyao Zhao,<sup>b</sup> Kui Wu,<sup>\*,a</sup> Yan Xiao,<sup>b</sup> Bingbing Zhang,<sup>b</sup> Haohai Yu,<sup>\*,a</sup> Huaijin Zhang<sup>a</sup>

<sup>a</sup>State Key Laboratory of Crystal Materials and Institute of Crystal Materials, Shandong University, Jinan, China

<sup>b</sup>College of Chemistry and Environmental Science, Hebei University, Baoding, China

*To whom correspondence should be addressed :*

*E-mail: wukui@sdu.edu.cn; haohaiyu@sdu.edu.cn;*

## **CONTENTS**

1. Synthesis of Title Compound
2. Structural Refinement and Crystal Data
3. Property Characterization
4. Figures and Tables
5. References

## 1. Synthesis of Title Compound

All the reagents were directly purchased from the Beijing Hawke Technology Co., Ltd. The whole preparation process is completed in an Ar-filled glovebox.

The synthesis of  $[\text{Sr}_4\text{Cl}_2][\text{Si}_3\text{S}_9]$  was carried out with the stoichiometric ratio (SrS: SrCl<sub>2</sub>: Si: S=3:1:3:6). We firstly put the raw material into a graphite crucible and then put the crucible into a flame-sealed silica tube with  $10^{-3}$  Pa to eliminate the corrosion problem between the quartz tube and the raw material. The silica tube was heated to 850 °C and kept at this temperature for about 50 hours and slowly reduced to ambient temperature over a period of 3 days. Finally, the high yield (>95%) of  $[\text{Sr}_4\text{Cl}_2][\text{Si}_3\text{S}_9]$  crystals were obtained and they were stable in air within half of year.

The SEM-EDS test of the crystal was performed with a Hitachi TM4000Plus scanning electron microscope, which shows that four chemical elements (Sr, Si, S and Cl) were contained in a ratio of approximately 4.198 : 3.584 : 9.952 : 2.266 (Figure S3).

## 2. Structural Refinement and Crystal Data

Selected high-quality crystal of  $[\text{Sr}_4\text{Cl}_2][\text{Si}_3\text{S}_9]$  was used for data collection by a Bruker D8 VENTURE diffractometer using Mo  $K\alpha$  radiation ( $\lambda = 0.71073 \text{ \AA}$ ) at 296 K. Its crystal structure was solved by direct method and refined using the SHELXTL program package.<sup>[1]</sup> Absorption correction was performed using the multi-scan method.<sup>[2]</sup> Reasonable anisotropic thermal parameters were obtained for all atoms by anisotropic refinement and extinction correction. PLATON was also used to check the final structures and no other symmetries were found.<sup>[3]</sup> Refinement parameters and data were detailed in Table S1.

### **3. Property Characterization**

#### **3.1 Powder X-ray Diffraction**

Powder X-ray diffraction (XRD) patterns of title compounds were collected on a Bruker D2 X-ray diffractometer with Cu K $\alpha$  radiation ( $\lambda = 1.5418 \text{ \AA}$ ) at room temperature. The  $2\theta$  range was  $10\text{--}70^\circ$  with a step size of  $0.02^\circ$  and a fixed counting time of 1s/step.

#### **3.2 UV–Vis–Near-IR (NIR) Diffuse-Reflectance Spectra**

Diffuse-reflectance spectra were measured by a Shimadzu SolidSpec-3700DUV spectrophotometer in the wavelength range of  $200\text{--}1100 \text{ nm}$  at room temperature. The absorption spectra were converted from the reflection spectra *via* the Kubelka–Munk function.

#### **3.3 IR and Raman Spectra**

The Infrared spectrum was carried out on a Shimadzu IR Affinity Fourier transform infrared spectrometer in the range of  $400\text{--}4000 \text{ cm}^{-1}$  with a resolution of  $4 \text{ cm}^{-1}$ . The crystals were mixed with KBr in a ratio of approximately 1:100 as the sample for measurement. The sample was dried and ground into a fine powder and then pressed into a transparent sheet. Finally, the sheet was loaded into the sample chamber and the IR spectral data were recorded.

Hand-picked crystals were first placed on object slides and then Raman spectra were recorded by a 532 nm laser using a LABRAM HR Evolution spectrometer equipped with a CCD detector. The integration time was set to 5 seconds.

#### **3.4 Second-harmonic Generation Measurements**

The powder SHG response was studied by the Kurtz and Perry method <sup>[4]</sup> with Q-switch laser ( $2.09 \text{ }\mu\text{m}$ , 3 Hz, 50 ns) of different particle sizes, including 38–55, 55–88, 88–105, 105–150, 150–200, and 200–250  $\mu\text{m}$ . The AgGaS<sub>2</sub> crystal was ground and sieved into the same size range as the reference.

#### **3.5 LDT Measurements**

The LDTs of title compounds were evaluated on powder sample ( $150\text{--}200 \text{ }\mu\text{m}$ ) with a pulsed YAG laser ( $1.06 \text{ }\mu\text{m}$ , 10 ns, 10 Hz). Similar size of AgGaS<sub>2</sub> is chosen as the reference. The judgment criterion is as follows: with increasing laser energy, the color

change of the powder sample is constantly observed by optical microscope to determine the damage threshold. To adjust different laser beams, an optical concave lens is added into the laser path. The damage spot is measured by the scale of optical microscope.

### **3.6 Thermal Properties**

The thermogravimetric analysis (TG) was performed using a NETZSCH STA449F3 thermal analyzer and the title compound was heated from 50°C to 950°C at a rate of 8°C/min under air conditions.

### **3.7 Computational Description**

In order to further investigate the relationship of structure–property, the electronic structure of title compound was studied by density functional theory (DFT) based on ab initio calculations.<sup>[5]</sup> The exchange–correlation potential was calculated using Perdew–Burke–Ernzerhof (PBE) functional within the generalized gradient approximation (GGA) with the scheme.<sup>[6]</sup> To achieve energy convergence, a plane-wave basis set energy cutoff was 720 eV within normal-conserving pseudo-potential (NCP)<sup>[7]</sup>. As important parameters for NLO crystal, SHG coefficients were also calculated.<sup>[8]</sup> Owing to the discontinuity of exchange correlation energy, the experimental value is usually larger than that of calculated band gap. Thus, scissors operators are used to make the conduction bands agree with the experimental values.

#### 4. Tables and Figures

**Table S1.** Crystal data and structure refinement for title compound.

**Table S2.** Link modes of  $\text{SiS}_4$  units in 197 known thiosilicates.

**Table S3.** The optical band gap and SHG response of the reported IR NLO chalcogenides ( $E_g > 3.0$  eV).

**Table S4.** LDTs of title compound and  $\text{AgGaS}_2$  (as the reference).

**Table S5.** Dipole moment calculation for  $[\text{Sr}_4\text{Cl}_2][\text{Si}_3\text{S}_9]$ .

**Table S6.** Property comparison of the  $[\text{Ae}_4\text{X}_2][\text{M}^{\text{IV}}_3\text{Q}_9]$  system.

**Table S7.** Property comparison of the reported chalcogenides.

**Table S8.** Property comparison of the reported thiosilicates.

**Figure S1.** The whole structures and link modes of  $\text{SiS}_4$  units in (a)  $\text{Na}_2\text{Si}_2\text{S}_5$ ; (b)  $\text{Cu}_4\text{NiSi}_2\text{S}_7$ ; (c)  $\text{Li}_2\text{MgSi}_2\text{S}_6$ ; (d)  $\text{Cs}_4\text{Si}_2\text{S}_6$  and (e)  $\text{Cs}_2\text{ZnSi}_3\text{S}_8$ .

**Figure S2.** Powder XRD patterns of title compound.

**Figure S3.** The SEM-EDS diagram of  $[\text{Sr}_4\text{Cl}_2][\text{Si}_3\text{S}_9]$ .

**Figure S4.** The TG and DSC curves of  $[\text{Sr}_4\text{Cl}_2][\text{Si}_3\text{S}_9]$ .

**Figure S5.** Band structures of (a)  $[\text{Sr}_4\text{Cl}_2][\text{Si}_3\text{S}_9]$  and (b)  $\text{Sr}_2\text{SiS}_4$ .

**Figure S6.** IR spectrum of  $[\text{Sr}_4\text{Cl}_2][\text{Si}_3\text{S}_9]$ .

**Table S1.** Crystal data and structure refinement for title compound.

|                                                                                          |                                                                     |
|------------------------------------------------------------------------------------------|---------------------------------------------------------------------|
| Empirical formula                                                                        | [Sr <sub>4</sub> Cl <sub>2</sub> ][Si <sub>3</sub> S <sub>9</sub> ] |
| formula weight                                                                           | 794.19                                                              |
| crystal system                                                                           | Hexagonal                                                           |
| space group                                                                              | <i>P</i> 6 <sub>3</sub>                                             |
| cell parameter <i>a</i> (Å)                                                              | 9.4397(8)                                                           |
| cell parameter <i>c</i> (Å)                                                              | 11.5555(11)                                                         |
| <i>Z</i> , <i>V</i> (Å <sup>3</sup> ) (Volume)                                           | 2, 891.73(17)                                                       |
| <i>D</i> <sub>c</sub> (g/cm <sup>3</sup> ) (calculated density)                          | 2.958                                                               |
| μ (mm <sup>-1</sup> ) (absorption coefficient)                                           | 13.429                                                              |
| goodness-of-fit on <i>F</i> <sup>2</sup>                                                 | 0.997                                                               |
| <i>R</i> <sub>1</sub> , <i>wR</i> <sub>2</sub> ( <i>I</i> > 2σ( <i>I</i> )) <sup>a</sup> | 0.0356, 0.0454                                                      |
| <i>R</i> <sub>1</sub> , <i>wR</i> <sub>2</sub> (all data)                                | 0.0272, 0.0437                                                      |
| absolute structure parameter                                                             | 0.018(8)                                                            |
| largest diff. peak and hole (e·Å <sup>-3</sup> )                                         | 0.516, -0.438                                                       |

<sup>[a]</sup> $R_1 = F_o - F_c / F_o$  and  $wR_2 = [w (F_o^2 - F_c^2)^2 / wF_o^4]^{1/2}$  for  $F_o^2 > 2\sigma (F_o^2)$



**Table S2.** Link modes of SiS<sub>4</sub> units in 197 known thiosilicates.

| <b>Compounds</b>                                               | <b>Space group</b>      | <b>Link modes</b>                             |
|----------------------------------------------------------------|-------------------------|-----------------------------------------------|
| Na <sub>2</sub> Si <sub>2</sub> S <sub>5</sub>                 | <i>Cmcm</i>             | Si <sub>4</sub> S <sub>10</sub>               |
| Cs <sub>2</sub> ZnSi <sub>3</sub> S <sub>8</sub>               | <i>P-1</i>              | 1D chain                                      |
| Rb <sub>2</sub> ZnSi <sub>3</sub> S <sub>8</sub>               | <i>P-1</i>              | 1D chain                                      |
| Cu <sub>2</sub> SiS <sub>3</sub>                               | <i>Cc</i>               | 1D chain                                      |
| Cs <sub>4</sub> Si <sub>2</sub> S <sub>6</sub>                 | <i>C2/m</i>             | Si <sub>2</sub> S <sub>6</sub> (edge-sharing) |
| Rb <sub>4</sub> Si <sub>2</sub> S <sub>6</sub>                 | <i>C2/m</i>             | Si <sub>2</sub> S <sub>6</sub> (edge-sharing) |
| Ag <sub>2</sub> SiS <sub>3</sub>                               | <i>P2<sub>1</sub>/c</i> | Si <sub>2</sub> S <sub>6</sub> (edge-sharing) |
| Li <sub>2</sub> Mg <sub>2</sub> Si <sub>2</sub> S <sub>6</sub> | <i>P31m</i>             | Si <sub>2</sub> S <sub>6</sub> (Si-Si)        |
| Cu <sub>4</sub> NiSi <sub>2</sub> S <sub>7</sub>               | <i>C2</i>               | Si <sub>2</sub> S <sub>7</sub>                |
| Sr <sub>2</sub> SiS <sub>4</sub>                               | <i>P2<sub>1</sub>/m</i> | SiS <sub>4</sub>                              |
| SrCu <sub>2</sub> SiS <sub>4</sub>                             | <i>P3<sub>1</sub>21</i> | SiS <sub>4</sub>                              |
| SrNa <sub>2</sub> SiS <sub>4</sub>                             | <i>R3c</i>              | SiS <sub>4</sub>                              |
| SrLi <sub>2</sub> SiS <sub>4</sub>                             | <i>I4-2m</i>            | SiS <sub>4</sub>                              |
| SrAg <sub>2</sub> SiS <sub>4</sub>                             | <i>I4-2m</i>            | SiS <sub>4</sub>                              |
| EuCu <sub>2</sub> SiS <sub>4</sub>                             | <i>P3<sub>1</sub>21</i> | SiS <sub>4</sub>                              |
| Cu <sub>2</sub> PbSiS <sub>4</sub>                             | <i>P3<sub>2</sub>21</i> | SiS <sub>4</sub>                              |
| Cu <sub>2</sub> FeSiS <sub>4</sub>                             | <i>Pmn2<sub>1</sub></i> | SiS <sub>4</sub>                              |
| α-Cu <sub>2</sub> ZnSiS <sub>4</sub>                           | <i>Pmn2<sub>1</sub></i> | SiS <sub>4</sub>                              |
| β-Cu <sub>2</sub> ZnSiS <sub>4</sub>                           | <i>Pn</i>               | SiS <sub>4</sub>                              |
| Cu <sub>2</sub> MgSiS <sub>4</sub>                             | <i>Pmn2<sub>1</sub></i> | SiS <sub>4</sub>                              |
| Cu <sub>2</sub> CdSiS <sub>4</sub>                             | <i>Pmn2<sub>1</sub></i> | SiS <sub>4</sub>                              |
| Cu <sub>2</sub> HgSiS <sub>4</sub>                             | <i>Pmn2<sub>1</sub></i> | SiS <sub>4</sub>                              |
| Cu <sub>2</sub> MnSiS <sub>4</sub>                             | <i>Pmn2<sub>1</sub></i> | SiS <sub>4</sub>                              |
| Cu <sub>2</sub> CoSiS <sub>4</sub>                             | <i>I4-2m</i>            | SiS <sub>4</sub>                              |
| Li <sub>2</sub> CdSiS <sub>4</sub>                             | <i>Pmn2<sub>1</sub></i> | SiS <sub>4</sub>                              |
| Li <sub>2</sub> HgSiS <sub>4</sub>                             | <i>Pmn2<sub>1</sub></i> | SiS <sub>4</sub>                              |
| Li <sub>2</sub> ZnSiS <sub>4</sub>                             | <i>Pna2<sub>1</sub></i> | SiS <sub>4</sub>                              |
| Ag <sub>2</sub> ZnSiS <sub>4</sub>                             | <i>Pn</i>               | SiS <sub>4</sub>                              |
| Ag <sub>2</sub> FeSiS <sub>4</sub>                             | <i>Pc</i>               | SiS <sub>4</sub>                              |
| Na <sub>2</sub> Hg <sub>3</sub> Si <sub>2</sub> S <sub>8</sub> | <i>P4-c2</i>            | SiS <sub>4</sub>                              |
| Pb <sub>2</sub> SiS <sub>4</sub>                               | <i>P2<sub>1</sub>/c</i> | SiS <sub>4</sub>                              |

|                                                              |        |                |
|--------------------------------------------------------------|--------|----------------|
| $\text{Ce}_3(\text{SiS}_4)_2\text{Br}$                       | $C2/c$ | $\text{SiS}_4$ |
| $\text{Ce}_3(\text{SiS}_4)_2\text{I}$                        | $C2/c$ | $\text{SiS}_4$ |
| $\text{Ce}_3(\text{SiS}_4)_2\text{Cl}$                       | $C2/c$ | $\text{SiS}_4$ |
| $\text{La}_3(\text{SiS}_4)_2\text{I}$                        | $C2/c$ | $\text{SiS}_4$ |
| $(\text{La}_2\text{Ce})(\text{SiS}_4)_2\text{I}$             | $C2/c$ | $\text{SiS}_4$ |
| $(\text{La}_{2.2}\text{Ce}_{0.8})(\text{SiS}_4)_2\text{I}$   | $C2/c$ | $\text{SiS}_4$ |
| $(\text{La}_{2.5}\text{Ce}_{0.5})(\text{SiS}_4)_2\text{I}$   | $C2/c$ | $\text{SiS}_4$ |
| $(\text{La}_{2.8}\text{Ce}_{0.2})(\text{SiS}_4)_2\text{I}$   | $C2/c$ | $\text{SiS}_4$ |
| $(\text{La}_{2.9}\text{Ce}_{0.1})(\text{SiS}_4)_2\text{I}$   | $C2/c$ | $\text{SiS}_4$ |
| $(\text{La}_{2.97}\text{Ce}_{0.03})(\text{SiS}_4)_2\text{I}$ | $C2/c$ | $\text{SiS}_4$ |
| $(\text{La}_{2.99}\text{Ce}_{0.01})(\text{SiS}_4)_2\text{I}$ | $C2/c$ | $\text{SiS}_4$ |
| $\text{Pr}_3(\text{SiS}_4)_2\text{I}$                        | $C2/c$ | $\text{SiS}_4$ |
| $\text{Nd}_3(\text{SiS}_4)_2\text{I}$                        | $C2/c$ | $\text{SiS}_4$ |
| $\text{Sm}_3(\text{SiS}_4)_2\text{I}$                        | $C2/c$ | $\text{SiS}_4$ |
| $\text{Tb}_3(\text{SiS}_4)_2\text{I}$                        | $C2/c$ | $\text{SiS}_4$ |
| $\text{Gd}_3(\text{SiS}_4)_2\text{Br}$                       | $C2/c$ | $\text{SiS}_4$ |
| $\text{La}_3(\text{SiS}_4)_2\text{Br}$                       | $C2/c$ | $\text{SiS}_4$ |
| $\text{Nd}_3(\text{SiS}_4)_2\text{Br}$                       | $C2/c$ | $\text{SiS}_4$ |
| $\text{Pr}_3(\text{SiS}_4)_2\text{Br}$                       | $C2/c$ | $\text{SiS}_4$ |
| $\text{Sm}_3(\text{SiS}_4)_2\text{Br}$                       | $C2/c$ | $\text{SiS}_4$ |
| $\text{La}_3(\text{SiS}_4)_2\text{Cl}$                       | $C2/c$ | $\text{SiS}_4$ |
| $\text{Ce}_3(\text{SiS}_4)_2\text{Cl}$                       | $C2/c$ | $\text{SiS}_4$ |
| $\text{Pr}_3(\text{SiS}_4)_2\text{Cl}$                       | $C2/c$ | $\text{SiS}_4$ |
| $\text{Ba}_2(\text{SiS}_4)$                                  | $Pnma$ | $\text{SiS}_4$ |
| $\text{KCeSiS}_4$                                            | $P2_1$ | $\text{SiS}_4$ |
| $\text{KYSiS}_4$                                             | $P2_1$ | $\text{SiS}_4$ |
| $\text{KLaSiS}_4$                                            | $P2_1$ | $\text{SiS}_4$ |
| $\text{KEuSiS}_4$                                            | $P2_1$ | $\text{SiS}_4$ |
| $\text{KYbSiS}_4$                                            | $P2_1$ | $\text{SiS}_4$ |
| $\text{KPrSiS}_4$                                            | $P2_1$ | $\text{SiS}_4$ |
| $\text{KNdSiS}_4$                                            | $P2_1$ | $\text{SiS}_4$ |
| $\text{CsPrSiS}_4$                                           | $P2_1$ | $\text{SiS}_4$ |
| $\text{CsNdSiS}_4$                                           | $P2_1$ | $\text{SiS}_4$ |

|                                                                      |              |                |
|----------------------------------------------------------------------|--------------|----------------|
| $\text{Na}_4\text{SiS}_4$                                            | $P2_12_12_1$ | $\text{SiS}_4$ |
| $\text{RbTbSiS}_4$                                                   | $P2_1$       | $\text{SiS}_4$ |
| $\text{RbHoSiS}_4$                                                   | $P2_1$       | $\text{SiS}_4$ |
| $\text{RbDySiS}_4$                                                   | $P2_1$       | $\text{SiS}_4$ |
| $\text{RbPrSiS}_4$                                                   | $P2_1$       | $\text{SiS}_4$ |
| $\text{RbGdSiS}_4$                                                   | $P2_1$       | $\text{SiS}_4$ |
| $\text{RbNdSiS}_4$                                                   | $P2_1$       | $\text{SiS}_4$ |
| $\text{CsDySiS}_4$                                                   | $P2_1$       | $\text{SiS}_4$ |
| $\text{CsErSiS}_4$                                                   | $P2_1$       | $\text{SiS}_4$ |
| $\text{CsEuSiS}_4$                                                   | $P2_1$       | $\text{SiS}_4$ |
| $\text{CsGdSiS}_4$                                                   | $P2_1$       | $\text{SiS}_4$ |
| $\text{CsHoSiS}_4$                                                   | $P2_1$       | $\text{SiS}_4$ |
| $\text{CsSmSiS}_4$                                                   | $P2_1$       | $\text{SiS}_4$ |
| $\text{CsTbSiS}_4$                                                   | $P2_1$       | $\text{SiS}_4$ |
| $\text{CsTmSiS}_4$                                                   | $P2_1$       | $\text{SiS}_4$ |
| $\text{RbEuSiS}_4$                                                   | $P2_1$       | $\text{SiS}_4$ |
| $\text{RbCeSiS}_4$                                                   | $Pnma$       | $\text{SiS}_4$ |
| $\text{CsLaSiS}_4$                                                   | $Pnma$       | $\text{SiS}_4$ |
| $\text{RbLaSiS}_4$                                                   | $Pnma$       | $\text{SiS}_4$ |
| $\text{CsCeSiS}_4$                                                   | $Pnma$       | $\text{SiS}_4$ |
| $\text{KLaSiS}_4$                                                    | $P2_1/m$     | $\text{SiS}_4$ |
| $\text{Ce}_4(\text{SiS}_4)_3$                                        | $R3c$        | $\text{SiS}_4$ |
| $\text{BaLa}_2\text{Si}_2\text{S}_8$                                 | $R-3c$       | $\text{SiS}_4$ |
| $\text{Ba}(\text{La}_{0.94}\text{Ce}_{0.06})_2\text{Si}_2\text{S}_8$ | $R-3c$       | $\text{SiS}_4$ |
| $\text{CeDyPbSi}_2\text{S}_8$                                        | $R-3c$       | $\text{SiS}_4$ |
| $\text{CeErPbSi}_2\text{S}_8$                                        | $R-3c$       | $\text{SiS}_4$ |
| $\text{CeSmPbSi}_2\text{S}_8$                                        | $R-3c$       | $\text{SiS}_4$ |
| $\text{CeTbPbSi}_2\text{S}_8$                                        | $R-3c$       | $\text{SiS}_4$ |
| $\text{CePrPbSi}_2\text{S}_8$                                        | $R-3c$       | $\text{SiS}_4$ |
| $\text{CeHoPbSi}_2\text{S}_8$                                        | $R-3c$       | $\text{SiS}_4$ |
| $\text{LaCePbSi}_2\text{S}_8$                                        | $R-3c$       | $\text{SiS}_4$ |
| $\text{LaErPbSi}_2\text{S}_8$                                        | $R-3c$       | $\text{SiS}_4$ |
| $\text{LaDyPbSi}_2\text{S}_8$                                        | $R-3c$       | $\text{SiS}_4$ |

|                                                                      |                         |                  |
|----------------------------------------------------------------------|-------------------------|------------------|
| PrErPbSi <sub>2</sub> S <sub>8</sub>                                 | <i>R-3c</i>             | SiS <sub>4</sub> |
| LaTbPbSi <sub>2</sub> S <sub>8</sub>                                 | <i>R-3c</i>             | SiS <sub>4</sub> |
| PrDyPbSi <sub>2</sub> S <sub>8</sub>                                 | <i>R-3c</i>             | SiS <sub>4</sub> |
| PrSmPbSi <sub>2</sub> S <sub>8</sub>                                 | <i>R-3c</i>             | SiS <sub>4</sub> |
| PrYPbSi <sub>2</sub> S <sub>8</sub>                                  | <i>R-3c</i>             | SiS <sub>4</sub> |
| PrTbPbSi <sub>2</sub> S <sub>8</sub>                                 | <i>R-3c</i>             | SiS <sub>4</sub> |
| PrHoPbSi <sub>2</sub> S <sub>8</sub>                                 | <i>R-3c</i>             | SiS <sub>4</sub> |
| LaYPbSi <sub>2</sub> S <sub>8</sub>                                  | <i>R-3c</i>             | SiS <sub>4</sub> |
| La <sub>2.1</sub> Pb <sub>0.9</sub> (SiS <sub>4</sub> ) <sub>2</sub> | <i>R-3c</i>             | SiS <sub>4</sub> |
| Li <sub>2</sub> PbSiS <sub>4</sub>                                   | <i>I-42m</i>            | SiS <sub>4</sub> |
| Ce <sub>2</sub> Pb(SiS <sub>4</sub> ) <sub>2</sub>                   | <i>R-3c</i>             | SiS <sub>4</sub> |
| Pr <sub>2</sub> Pb(SiS <sub>4</sub> ) <sub>2</sub>                   | <i>R-3c</i>             | SiS <sub>4</sub> |
| Nd <sub>2</sub> Pb(SiS <sub>4</sub> ) <sub>2</sub>                   | <i>R-3c</i>             | SiS <sub>4</sub> |
| Tl <sub>2</sub> PbSiS <sub>4</sub>                                   | <i>P2<sub>1</sub>/c</i> | SiS <sub>4</sub> |
| RbSiBiS <sub>4</sub>                                                 | <i>P2<sub>1</sub>/c</i> | SiS <sub>4</sub> |
| CsSiBiS <sub>4</sub>                                                 | <i>P2<sub>1</sub>/c</i> | SiS <sub>4</sub> |
| KBiSiS <sub>4</sub>                                                  | <i>P2<sub>1</sub>/c</i> | SiS <sub>4</sub> |
| SiSn <sub>2</sub> S <sub>4</sub>                                     | <i>P2<sub>1</sub>/c</i> | SiS <sub>4</sub> |
| Pr <sub>6</sub> Si <sub>4</sub> S <sub>17</sub>                      | <i>P-1</i>              | SiS <sub>4</sub> |
| Nd <sub>6</sub> Si <sub>4</sub> S <sub>17</sub>                      | <i>P-1</i>              | SiS <sub>4</sub> |
| Sm <sub>6</sub> Si <sub>4</sub> S <sub>17</sub>                      | <i>P-1</i>              | SiS <sub>4</sub> |
| Ce <sub>6</sub> Si <sub>4</sub> S <sub>17</sub>                      | <i>P-1</i>              | SiS <sub>4</sub> |
| Ce <sub>2</sub> SiS <sub>5</sub>                                     | <i>P2<sub>1</sub>/c</i> | SiS <sub>4</sub> |
| Ba <sub>3</sub> SiS <sub>5</sub>                                     | <i>Pnma</i>             | SiS <sub>4</sub> |
| Cu <sub>8</sub> SiS <sub>6</sub>                                     | <i>Pmn2<sub>1</sub></i> | SiS <sub>4</sub> |
| Sm <sub>3</sub> ClS <sub>2</sub> (SiS <sub>4</sub> )                 | <i>Pnma</i>             | SiS <sub>4</sub> |
| Nd <sub>3</sub> ClS <sub>2</sub> (SiS <sub>4</sub> )                 | <i>Pnma</i>             | SiS <sub>4</sub> |
| Ag <sub>8</sub> (SiS <sub>4</sub> )S <sub>2</sub>                    | <i>Pna2<sub>1</sub></i> | SiS <sub>4</sub> |
| Hg <sub>4</sub> SiS <sub>6</sub>                                     | <i>Cc</i>               | SiS <sub>4</sub> |
| Cd <sub>4</sub> SiS <sub>6</sub>                                     | <i>Cc</i>               | SiS <sub>4</sub> |
| CeYPbSi <sub>2</sub> S <sub>8</sub>                                  | <i>R-3c</i>             | SiS <sub>4</sub> |
| La <sub>3</sub> Sb <sub>0.33</sub> SiS <sub>7</sub>                  | <i>P6<sub>3</sub></i>   | SiS <sub>4</sub> |
| Pr <sub>3</sub> Sb <sub>0.33</sub> SiS <sub>7</sub>                  | <i>P6<sub>3</sub></i>   | SiS <sub>4</sub> |

|                                                               |        |                |
|---------------------------------------------------------------|--------|----------------|
| $\text{La}_3\text{Al}_{0.44}\text{Si}_{0.93}\text{S}_7$       | $P6_3$ | $\text{SiS}_4$ |
| $\text{Gd}_3\text{Cd}_{0.50}\text{SiS}_7$                     | $P6_3$ | $\text{SiS}_4$ |
| $\text{Y}_3\text{Pd}_{0.50}\text{SiS}_7$                      | $P6_3$ | $\text{SiS}_4$ |
| $\text{Al}_{0.33}\text{Sm}_3\text{SiS}_7$                     | $P6_3$ | $\text{SiS}_4$ |
| $\text{In}_{0.33}\text{Sm}_3\text{SiS}_7$                     | $P6_3$ | $\text{SiS}_4$ |
| $\text{Gd}_3\text{Cd}_{0.5}\text{SiS}_7$                      | $P6_3$ | $\text{SiS}_4$ |
| $\text{Sm}_3\text{Ag}_{0.77}\text{SiS}_7$                     | $P6_3$ | $\text{SiS}_4$ |
| $\text{La}_3\text{CuSiS}_7$                                   | $P6_3$ | $\text{SiS}_4$ |
| $\text{Y}_3\text{CuSiS}_7$                                    | $P6_3$ | $\text{SiS}_4$ |
| $\text{Ce}_3\text{CuSiS}_7$                                   | $P6_3$ | $\text{SiS}_4$ |
| $\text{Nd}_3\text{CuSiS}_7$                                   | $P6_3$ | $\text{SiS}_4$ |
| $\text{Pr}_3\text{CuSiS}_7$                                   | $P6_3$ | $\text{SiS}_4$ |
| $\text{Sm}_3\text{CuSiS}_7$                                   | $P6_3$ | $\text{SiS}_4$ |
| $\text{Tb}_3\text{CuSiS}_7$                                   | $P6_3$ | $\text{SiS}_4$ |
| $\text{Dy}_3\text{CuSiS}_7$                                   | $P6_3$ | $\text{SiS}_4$ |
| $\text{Er}_3\text{CuSiS}_7$                                   | $P6_3$ | $\text{SiS}_4$ |
| $\text{Ho}_3\text{CuSiS}_7$                                   | $P6_3$ | $\text{SiS}_4$ |
| $\text{Gd}_3\text{CuSiS}_7$                                   | $P6_3$ | $\text{SiS}_4$ |
| $\text{La}_3\text{AgSiS}_7$                                   | $P6_3$ | $\text{SiS}_4$ |
| $\text{Ce}_3\text{AgSiS}_7$                                   | $P6_3$ | $\text{SiS}_4$ |
| $\text{Nd}_3\text{AgSiS}_7$                                   | $P6_3$ | $\text{SiS}_4$ |
| $\text{Pr}_3\text{AgSiS}_7$                                   | $P6_3$ | $\text{SiS}_4$ |
| $\text{Sm}_3\text{AgSiS}_7$                                   | $P6_3$ | $\text{SiS}_4$ |
| $\text{La}_3\text{Ag}_{0.9}\text{SiS}_7$                      | $P6_3$ | $\text{SiS}_4$ |
| $\text{Ce}_3\text{Ag}_{0.82}\text{SiS}_7$                     | $P6_3$ | $\text{SiS}_4$ |
| $\text{Pr}_3\text{Ag}_{0.85}\text{SiS}_7$                     | $P6_3$ | $\text{SiS}_4$ |
| $\text{Nd}_3\text{Ag}_{0.81}\text{SiS}_7$                     | $P6_3$ | $\text{SiS}_4$ |
| $\text{La}_3\text{Cr}_{0.5}\text{SiS}_7$                      | $P6_3$ | $\text{SiS}_4$ |
| $\text{Y}_3\text{Cr}_{0.5}\text{SiS}_7$                       | $P6_3$ | $\text{SiS}_4$ |
| $\text{La}_3\text{Cd}_{0.5}\text{SiS}_7$                      | $P6_3$ | $\text{SiS}_4$ |
| $\text{LaSmPbSi}_2\text{S}_8$                                 | $R-3c$ | $\text{SiS}_4$ |
| $\text{LaHoPbSi}_2\text{S}_8$                                 | $R-3c$ | $\text{SiS}_4$ |
| $(\text{Ag}_{0.56}\text{Li}_{1.44})\text{In}_2(\text{SiS}_6)$ | $Cc$   | $\text{SiS}_4$ |

|                                                               |             |                |
|---------------------------------------------------------------|-------------|----------------|
| $(\text{Ag}_{0.88}\text{Li}_{1.12})\text{In}_2(\text{SiS}_6)$ | <i>Cc</i>   | $\text{SiS}_4$ |
| $\text{Li}_2\text{In}_2\text{SiS}_6$                          | <i>Cc</i>   | $\text{SiS}_4$ |
| $\text{Na}_2\text{In}_2\text{SiS}_6$                          | <i>Cc</i>   | $\text{SiS}_4$ |
| $\text{Cu}_2\text{In}_2\text{SiS}_6$                          | <i>Cc</i>   | $\text{SiS}_4$ |
| $\text{Ag}_2\text{In}_2\text{SiS}_6$                          | <i>Cc</i>   | $\text{SiS}_4$ |
| $\text{ZnY}_6\text{Si}_2\text{S}_{14}$                        | <i>P6_3</i> | $\text{SiS}_4$ |
| $\text{Y}_6\text{MgSi}_2\text{S}_{14}$                        | <i>P6_3</i> | $\text{SiS}_4$ |
| $\text{FeSm}_6\text{Si}_2\text{S}_{14}$                       | <i>P6_3</i> | $\text{SiS}_4$ |
| $\text{La}_6\text{ZnSi}_2\text{S}_{14}$                       | <i>P6_3</i> | $\text{SiS}_4$ |
| $\text{La}_6\text{MnSi}_2\text{S}_{14}$                       | <i>P6_3</i> | $\text{SiS}_4$ |
| $\text{Ce}_6\text{MnSi}_2\text{S}_{14}$                       | <i>P6_3</i> | $\text{SiS}_4$ |
| $\text{La}_6\text{In}_{0.67}\text{Si}_2\text{S}_{14}$         | <i>P6_3</i> | $\text{SiS}_4$ |
| $\text{La}_6\text{MgSi}_2\text{S}_{14}$                       | <i>P6_3</i> | $\text{SiS}_4$ |
| $\text{La}_6\text{NiSi}_2\text{S}_{14}$                       | <i>P6_3</i> | $\text{SiS}_4$ |
| $\text{La}_6\text{Sn}_{0.5}\text{Si}_2\text{S}_{14}$          | <i>P6_3</i> | $\text{SiS}_4$ |
| $\text{La}_6\text{CoSi}_2\text{S}_{14}$                       | <i>P6_3</i> | $\text{SiS}_4$ |
| $\text{Dy}_6\text{MnSi}_2\text{S}_{14}$                       | <i>P6_3</i> | $\text{SiS}_4$ |
| $\text{Er}_6\text{MnS}_{14}\text{Si}_2$                       | <i>P6_3</i> | $\text{SiS}_4$ |
| $\text{Y}_6\text{FeSi}_2\text{S}_{14}$                        | <i>P6_3</i> | $\text{SiS}_4$ |
| $\text{Gd}_6\text{MnSi}_2\text{S}_{14}$                       | <i>P6_3</i> | $\text{SiS}_4$ |
| $\text{Nd}_6\text{MnSi}_2\text{S}_{14}$                       | <i>P6_3</i> | $\text{SiS}_4$ |
| $\text{Pr}_6\text{MnSi}_2\text{S}_{14}$                       | <i>P6_3</i> | $\text{SiS}_4$ |
| $\text{Sm}_6\text{MnSi}_2\text{S}_{14}$                       | <i>P6_3</i> | $\text{SiS}_4$ |
| $\text{Tm}_6\text{MnSi}_2\text{S}_{14}$                       | <i>P6_3</i> | $\text{SiS}_4$ |
| $\text{Y}_6\text{MnSi}_2\text{S}_{14}$                        | <i>P6_3</i> | $\text{SiS}_4$ |
| $\text{La}_6\text{Cu}_2(\text{SiS}_4)_2\text{S}_6$            | <i>P6_3</i> | $\text{SiS}_4$ |
| $\text{La}_6\text{FeSi}_2\text{S}_{14}$                       | <i>P6_3</i> | $\text{SiS}_4$ |
| $\text{La}_6\text{PdSi}_2\text{S}_{14}$                       | <i>P6_3</i> | $\text{SiS}_4$ |
| $\text{NaY}_3\text{S}_3(\text{SiS}_4)$                        | <i>P6_3</i> | $\text{SiS}_4$ |
| $\text{Gd}_3(\text{CuS}_3)(\text{SiS}_4)$                     | <i>P6_3</i> | $\text{SiS}_4$ |
| $\text{CuCe}_3\text{S}_3(\text{SiS}_4)$                       | <i>P6_3</i> | $\text{SiS}_4$ |
| $\text{NaSm}_3\text{S}_3(\text{SiS}_4)$                       | <i>P6_3</i> | $\text{SiS}_4$ |
| $\text{Ba}_8\text{Si}_2\text{US}_{14}$                        | <i>C2/m</i> | $\text{SiS}_4$ |

**Table S3.** The optical band gap and SHG response of the reported IR NLO chalcogenides ( $E_g > 3.0$  eV ).

| Compounds                                                                     | $E_g$ (eV)  | $d_{ij}$ ( $\times$ AGS) | LDT( $\times$ AGS) | PM/NPM    | Ref.             |
|-------------------------------------------------------------------------------|-------------|--------------------------|--------------------|-----------|------------------|
| [Sr <sub>4</sub> Cl <sub>2</sub> ][Si <sub>3</sub> S <sub>9</sub> ]           | <b>4.22</b> | <b>1.2</b>               | <b>12</b>          | <b>PM</b> | <b>This work</b> |
| Li[LiCs <sub>2</sub> Cl][Ga <sub>3</sub> S <sub>6</sub> ]                     | 4.18        | 0.7                      | 4.1                | PM        | [9]              |
| [CsBa <sub>3</sub> Cl <sub>2</sub> ][Ga <sub>5</sub> S <sub>10</sub> ]        | 3.96        | 0.9                      | 6.7                | PM        | [10]             |
| [RbBa <sub>3</sub> Cl <sub>2</sub> ][Ga <sub>5</sub> S <sub>10</sub> ]        | 3.95        | 0.93                     | 6.5                | PM        | [10]             |
| [KBa <sub>3</sub> Cl <sub>2</sub> ][Ga <sub>5</sub> S <sub>10</sub> ]         | 3.93        | 0.95                     | 6.3                | PM        | [10]             |
| [Ba <sub>4</sub> Cl <sub>2</sub> ][ZnGa <sub>4</sub> S <sub>10</sub> ]        | 3.85        | 1.1                      | 51                 | PM        | [11]             |
| K <sub>2</sub> Ba <sub>3</sub> Ge <sub>3</sub> S <sub>9</sub> Cl <sub>2</sub> | 3.69        | 0.34                     | 28.8               | N/A       | [12]             |
| [Rb <sub>3</sub> Cl][Ga <sub>3</sub> PS <sub>8</sub> ]                        | 3.65        | 1.1                      | 37                 | PM        | [13]             |
| [K <sub>3</sub> Cl][Ga <sub>3</sub> PS <sub>8</sub> ]                         | 3.6         | 1                        | 39                 | PM        | [13]             |
| [KBa <sub>4</sub> Cl][Ge <sub>3</sub> S <sub>10</sub> ]                       | 3.57        | 0.82                     | N/A                | NPM       | [14]             |
| [NaSr <sub>4</sub> Cl][Ge <sub>3</sub> S <sub>10</sub> ]                      | 3.54        | 1.08                     | N/A                | NPM       | [14]             |
| [KSr <sub>4</sub> Cl][Ge <sub>3</sub> S <sub>10</sub> ]                       | 3.51        | 0.91                     | N/A                | NPM       | [14]             |
| NaBa <sub>4</sub> Ge <sub>3</sub> S <sub>10</sub> Cl                          | 3.49        | 0.33                     | 20                 | N/A       | [15]             |
| [CsBa <sub>2</sub> Cl][Ga <sub>4</sub> S <sub>8</sub> ]                       | 3.35        | 0.9-1.0                  | 11-12              | PM        | [16]             |
| [RbBa <sub>2</sub> Cl][Ga <sub>4</sub> S <sub>8</sub> ]                       | 3.3         | 0.9-1.0                  | 11-12              | PM        | [16]             |
| [KBa <sub>3</sub> Cl <sub>2</sub> ][Ga <sub>5</sub> Se <sub>10</sub> ]        | 3.25        | 0.9                      | 9.7                | NPM       | [17]             |
| [K <sub>4</sub> Cl][CdGa <sub>9</sub> S <sub>16</sub> ]                       | 3.14        | 0.9                      | 22.6               | PM        | [18]             |
| [Ba <sub>4</sub> Cl <sub>2</sub> ][ZnGa <sub>4</sub> Se <sub>10</sub> ]       | 3.08        | 1.6                      | 17                 | NPM       | [19]             |
| CsHg <sub>3</sub> P <sub>2</sub> S <sub>8</sub> Cl                            | 3           | 0.8                      | N/A                | PM        | [20]             |

\*AGS = AgGaS<sub>2</sub>

**Table S4.** LDTs of title compound and AgGaS<sub>2</sub> (as the reference).

| <b>Compounds</b>                                                    | <b>damage energy<br/>(mJ)</b> | <b>spot diameter<br/>(mm)</b> | <b>LDT<br/>(MW/cm<sup>2</sup>)</b> | <b>LDT (×<br/>AGS)*</b> |
|---------------------------------------------------------------------|-------------------------------|-------------------------------|------------------------------------|-------------------------|
| AgGaS <sub>2</sub>                                                  | 0.92                          | 0.5                           | 4.69                               | 1                       |
| [Sr <sub>4</sub> Cl <sub>2</sub> ][Si <sub>3</sub> S <sub>9</sub> ] | 10.70                         | 0.5                           | 54.49                              | ~12                     |

\*AGS = AgGaS<sub>2</sub>



**Table S5.** Dipole moment of SiS<sub>4</sub> in the [Sr<sub>4</sub>Cl<sub>2</sub>][Si<sub>3</sub>S<sub>9</sub>].

| <b>Dipole Moment</b>                                               |             |             |             |                  |                                             |
|--------------------------------------------------------------------|-------------|-------------|-------------|------------------|---------------------------------------------|
| <b>Unit</b>                                                        | <b>x(a)</b> | <b>y(b)</b> | <b>z(c)</b> | <b>Magnitude</b> |                                             |
|                                                                    |             |             |             | <b>Debye</b>     | <b>×10<sup>-4</sup>esu·cm/Å<sup>3</sup></b> |
| <b>[Sr<sub>4</sub>Cl<sub>2</sub>][Si<sub>3</sub>S<sub>9</sub>]</b> |             |             |             |                  |                                             |
| SiS <sub>4</sub>                                                   | 0.00        | 0.00        | 13.20       | 13.20            | 0.03                                        |

**Table S6.** Property comparison of the  $[\text{Ae}_4\text{X}_2][\text{M}^{\text{IV}}_3\text{Q}_9]$  system.

| Compounds                                         | Space group | $E_g(\text{eV})$ | $d_{ij}(\times \text{AGS})$ | LDT( $\times \text{AGS}$ ) | Ref.             |
|---------------------------------------------------|-------------|------------------|-----------------------------|----------------------------|------------------|
| $[\text{Sr}_4\text{Cl}_2][\text{Si}_3\text{S}_9]$ | $P6_3$      | 4.22             | 1.2                         | 12                         | <b>This work</b> |
| $\text{Ba}_4\text{Ge}_3\text{S}_9\text{Cl}_2$     | $P6_3$      | 2.91             | 2.4                         | N/A                        | [21]             |
| $\text{Ba}_4\text{Si}_3\text{Se}_9\text{Cl}_2$    | $P6_3$      | 1.76             | 0.5                         | N/A                        | [21]             |
| $\text{Ba}_4\text{Ge}_3\text{Se}_9\text{Cl}_2$    | $P6_3$      | 1.89             | 0.5                         | N/A                        | [21]             |
| $\text{Ba}_4\text{Si}_3\text{Se}_9\text{Br}_2$    | $P6_3$      | 2.96             | 3.2                         | N/A                        | [22]             |
| $\text{Ba}_4\text{Ge}_3\text{Se}_9\text{Br}_2$    | $P6_3$      | 2.60             | 3.5                         | N/A                        | [22]             |

\*AGS =  $\text{AgGaS}_2$

**Table S7.** Property comparison of the reported NLO chalcogenides.

| No. | Compounds                                                                               | $E_g$ (eV) | $d_{ij}$ ( $\times$ AGS) | LDT( $\times$ AGS) | PM/NPM | Ref. |
|-----|-----------------------------------------------------------------------------------------|------------|--------------------------|--------------------|--------|------|
| 1   | Li[LiCs <sub>2</sub> Cl][Ga <sub>3</sub> S <sub>6</sub> ]                               | 4.18       | 0.7                      | 4.1                | PM     | [9]  |
| 2   | [CsBa <sub>3</sub> Cl <sub>2</sub> ][Ga <sub>5</sub> S <sub>10</sub> ]                  | 3.96       | 0.9                      | 6.7                | PM     | [10] |
| 3   | [RbBa <sub>3</sub> Cl <sub>2</sub> ][Ga <sub>5</sub> S <sub>10</sub> ]                  | 3.95       | 0.93                     | 6.5                | PM     | [10] |
| 4   | [KBa <sub>3</sub> Cl <sub>2</sub> ][Ga <sub>5</sub> S <sub>10</sub> ]                   | 3.93       | 0.95                     | 6.3                | PM     | [10] |
| 5   | [Ba <sub>4</sub> Cl <sub>2</sub> ][ZnGa <sub>4</sub> S <sub>10</sub> ]                  | 3.85       | 1.1                      | 51                 | PM     | [11] |
| 6   | K <sub>2</sub> Ba <sub>3</sub> Ge <sub>3</sub> S <sub>9</sub> Cl <sub>2</sub>           | 3.69       | 0.34                     | 28.8               | N/A    | [12] |
| 7   | [Rb <sub>3</sub> Cl][Ga <sub>3</sub> PS <sub>8</sub> ]                                  | 3.65       | 1.1                      | 37                 | PM     | [13] |
| 8   | [K <sub>3</sub> Cl][Ga <sub>3</sub> PS <sub>8</sub> ]                                   | 3.6        | 1                        | 39                 | PM     | [13] |
| 9   | [KBa <sub>4</sub> Cl][Ge <sub>3</sub> S <sub>10</sub> ]                                 | 3.57       | 0.82                     | N/A                | NPM    | [14] |
| 10  | [NaSr <sub>4</sub> Cl][Ge <sub>3</sub> S <sub>10</sub> ]                                | 3.54       | 1.08                     | N/A                | NPM    | [14] |
| 11  | [KSr <sub>4</sub> Cl][Ge <sub>3</sub> S <sub>10</sub> ]                                 | 3.51       | 0.91                     | N/A                | NPM    | [14] |
| 12  | NaBa <sub>4</sub> Ge <sub>3</sub> S <sub>10</sub> Cl                                    | 3.49       | 0.33                     | 20                 | N/A    | [15] |
| 13  | [CsBa <sub>2</sub> Cl][Ga <sub>4</sub> S <sub>8</sub> ]                                 | 3.35       | 0.9-1.0                  | 11-12              | PM     | [16] |
| 14  | [RbBa <sub>2</sub> Cl][Ga <sub>4</sub> S <sub>8</sub> ]                                 | 3.3        | 0.9-1.0                  | 11-12              | PM     | [16] |
| 15  | [KBa <sub>3</sub> Cl <sub>2</sub> ][Ga <sub>5</sub> Se <sub>10</sub> ]                  | 3.25       | 0.9                      | 9.7                | NPM    | [17] |
| 16  | [K <sub>4</sub> Cl][CdGa <sub>9</sub> S <sub>16</sub> ]                                 | 3.14       | 0.9                      | 22.6               | PM     | [18] |
| 17  | [Ba <sub>4</sub> Cl <sub>2</sub> ][ZnGa <sub>4</sub> Se <sub>10</sub> ]                 | 3.08       | 1.6                      | 17                 | NPM    | [19] |
| 18  | CsHg <sub>3</sub> P <sub>2</sub> S <sub>8</sub> Cl                                      | 3          | 0.8                      | N/A                | PM     | [20] |
| 19  | [Ba <sub>4</sub> Cl <sub>2</sub> ][HgGa <sub>4</sub> S <sub>10</sub> ]                  | 2.95       | 1.5                      | 15                 | N/A    | [23] |
| 20  | Ba <sub>4</sub> Ge <sub>3</sub> S <sub>9</sub> Cl <sub>2</sub>                          | 2.91       | 2.4                      | N/A                | NPM    | [21] |
| 21  | Ag <sub>5</sub> PS <sub>4</sub> Cl <sub>2</sub>                                         | 2.71       | 2.5                      | 3.8                | PM     | [24] |
| 22  | [Rb <sub>4</sub> Cl][Cd <sub>11</sub> In <sub>9</sub> S <sub>26</sub> ]                 | 2.32       | 0.23                     | 4.9                | N/A    | [25] |
| 23  | La <sub>6</sub> Cd <sub>0.75</sub> Ga <sub>2</sub> S <sub>11.5</sub> Cl <sub>2.5</sub>  | 2.28       | 0.8                      | N/A                | N/A    | [26] |
| 24  | Cu <sub>6</sub> PS <sub>5</sub> Cl                                                      | 2.22       | 2                        | N/A                | N/A    | [27] |
| 25  | Ag <sub>6</sub> PS <sub>5</sub> Cl                                                      | 2.01       | 2.7                      | N/A                | N/A    | [27] |
| 26  | [K <sub>4</sub> Cl][CdGa <sub>9</sub> Se <sub>16</sub> ]                                | 1.72       | 2.4                      | N/A                | PM     | [18] |
| 27  | Ba <sub>4</sub> Ge <sub>3</sub> Se <sub>9</sub> Cl <sub>2</sub>                         | 1.89       | 1                        | N/A                | NPM    | [21] |
| 28  | Ba <sub>4</sub> Si <sub>3</sub> Se <sub>9</sub> Cl <sub>2</sub>                         | 1.76       | 1                        | N/A                | NPM    | [21] |
| 29  | La <sub>6</sub> Cd <sub>0.75</sub> Ga <sub>2</sub> Se <sub>11.5</sub> Cl <sub>2.5</sub> | 1.65       | 0.1                      | N/A                | N/A    | [26] |

\*AGS = AgGaS<sub>2</sub>

**Table S8.** Property comparison of the reported NLO thiosilicates.

| No. | Compounds                                                      | $E_g$ (eV) | $d_{ij}(\times\text{AGS})$ | LDT( $\times\text{AGS}$ ) | PM/NPM | Ref. |
|-----|----------------------------------------------------------------|------------|----------------------------|---------------------------|--------|------|
| 1   | SrLi <sub>2</sub> SiS <sub>4</sub>                             | 3.94       | 0.4                        | 21                        | PM     | [28] |
| 2   | Li <sub>2</sub> ZnSiS <sub>4</sub>                             | 3.9        | 1.1                        | 10                        | PM     | [29] |
| 3   | SrNa <sub>2</sub> SiS <sub>4</sub>                             | 3.87       | 0.4                        | 17                        | PM     | [28] |
| 4   | Li <sub>2</sub> CdSiS <sub>4</sub>                             | 3.76       | 1                          | N/A                       | PM     | [30] |
| 5   | BaGa <sub>2</sub> SiS <sub>6</sub>                             | 3.75       | 1                          | N/A                       | PM     | [31] |
| 6   | Li <sub>2</sub> In <sub>2</sub> SiS <sub>6</sub>               | 3.61       | 1                          | N/A                       | N/A    | [32] |
| 7   | $\beta$ -Cu <sub>2</sub> ZnSiS <sub>4</sub>                    | 3.2        | 1.2                        | N/A                       | N/A    | [33] |
| 8   | SrCu <sub>2</sub> SiS <sub>4</sub>                             | 3.04       | 0.78                       | 8                         | PM     | [28] |
| 9   | $\alpha$ -Cu <sub>2</sub> ZnSiS <sub>4</sub>                   | 3          | 1.2                        | N/A                       | N/A    | [33] |
| 10  | Na <sub>2</sub> Hg <sub>3</sub> Si <sub>2</sub> S <sub>8</sub> | 2.86       | 1.3                        | 4.5                       | PM     | [34] |
| 11  | Cd <sub>4</sub> SiS <sub>6</sub>                               | 2.75       | 1.3                        | N/A                       | N/A    | [35] |
| 12  | Li <sub>2</sub> HgSiS <sub>4</sub>                             | 2.68       | 0.8                        | 3                         | NPM    | [36] |
| 13  | Na <sub>2</sub> In <sub>2</sub> SiS <sub>6</sub>               | 2.47       | 4.3                        | 6.9                       | PM     | [37] |
| 14  | SrAg <sub>2</sub> SiS <sub>4</sub>                             | 2.08       | 0.6                        | N/A                       | N/A    | [38] |
| 15  | La <sub>6</sub> PdSi <sub>2</sub> S <sub>14</sub>              | 1.41       | 3.7                        | 3                         | PM     | [39] |

\*AGS = AgGaS<sub>2</sub>

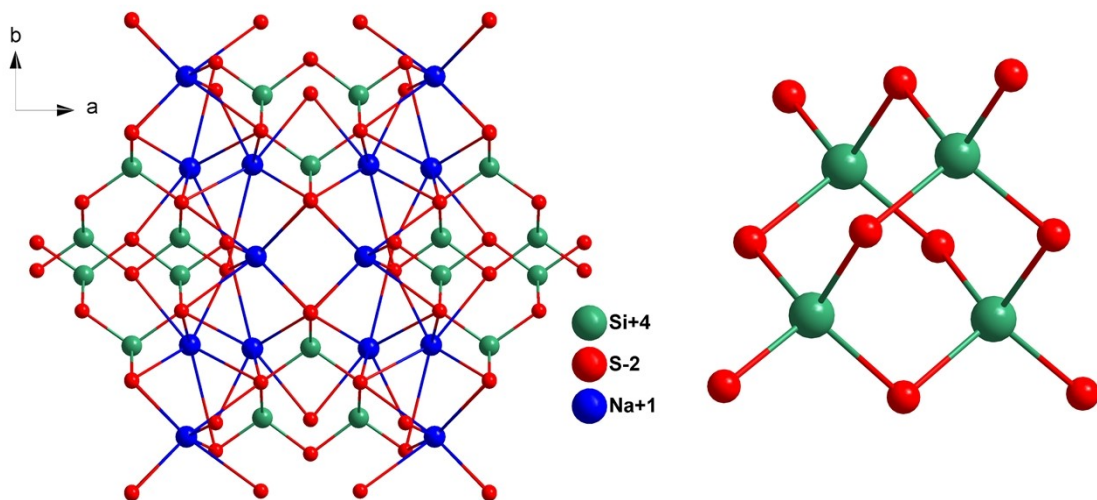

(a)

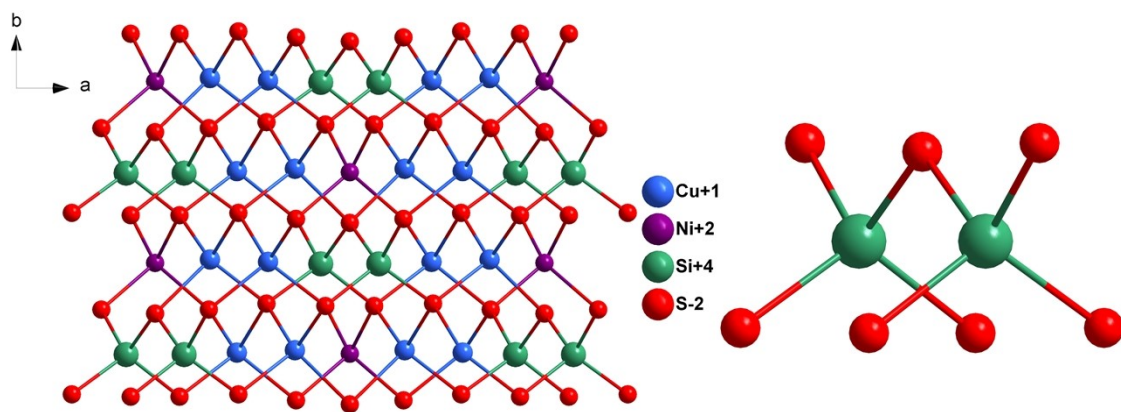

(b)

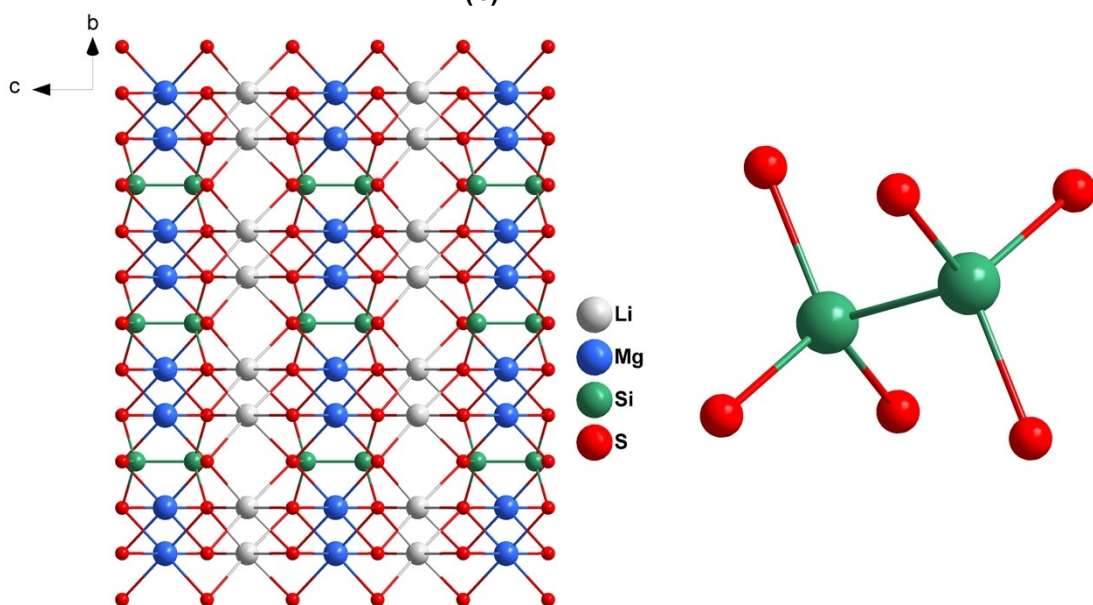

(c)

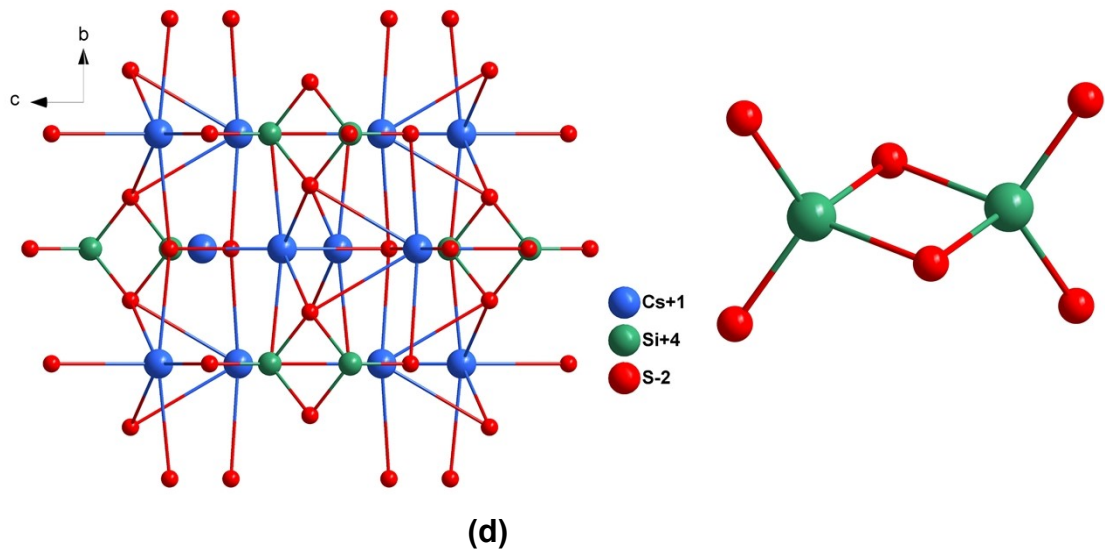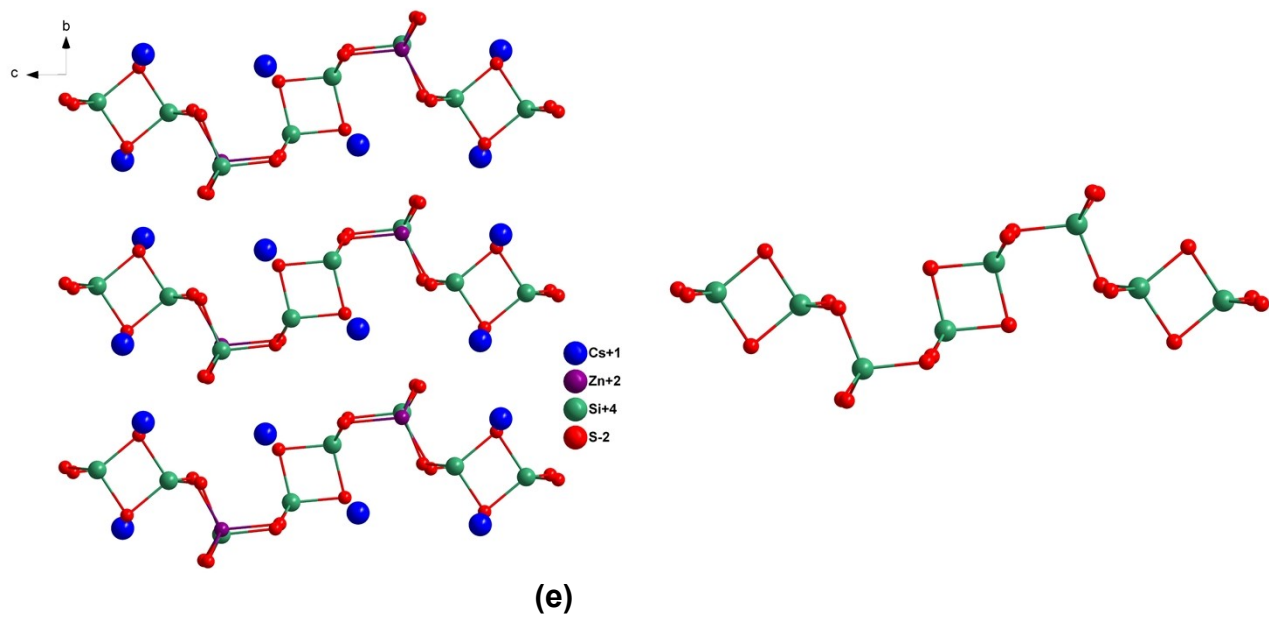

**Fig. S1.** The whole structures and link modes of  $\text{SiS}_4$  units in (a)  $\text{Na}_2\text{Si}_2\text{S}_5$ ; (b)  $\text{Cu}_4\text{NiSi}_2\text{S}_7$ ; (c)  $\text{Li}_2\text{MgSi}_2\text{S}_6$ ; (d)  $\text{Cs}_4\text{Si}_2\text{S}_6$  and (e)  $\text{Cs}_2\text{ZnSi}_3\text{S}_8$ .

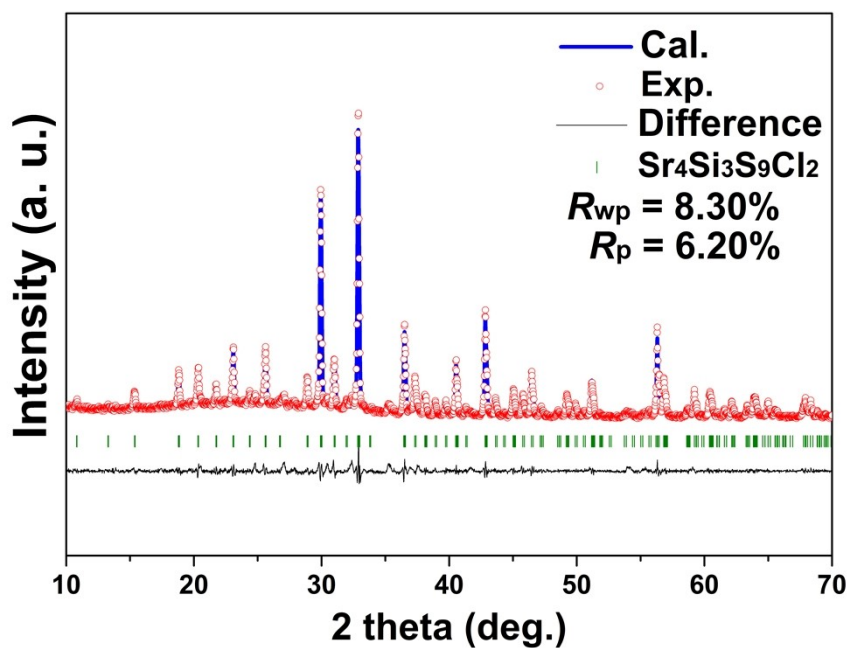

**Fig. S2.** Powder XRD patterns of title compound.

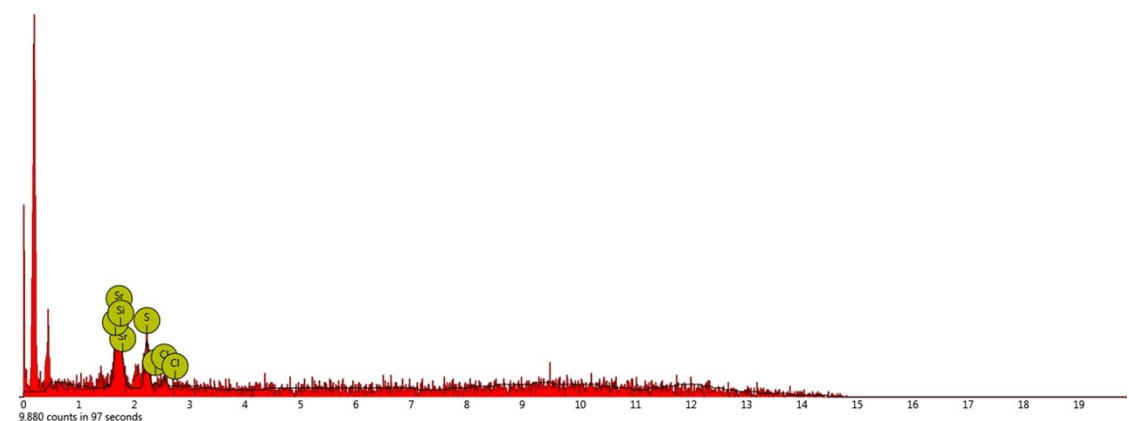

| Element | Weight% | Atomic% | Formula |
|---------|---------|---------|---------|
| Sr      | 42.38   | 20.99   | 4.198   |
| Si      | 11.60   | 17.92   | 3.584   |
| S       | 36.77   | 49.76   | 9.952   |
| Cl      | 9.26    | 11.33   | 2.266   |

Formula:  $\text{Sr}_{4.198}\text{Si}_{3.584}\text{S}_{9.952}\text{Cl}_{2.266}$

**Fig. S3.** The SEM-EDS diagram of  $[\text{Sr}_4\text{Cl}_2][\text{Si}_3\text{S}_9]$ .

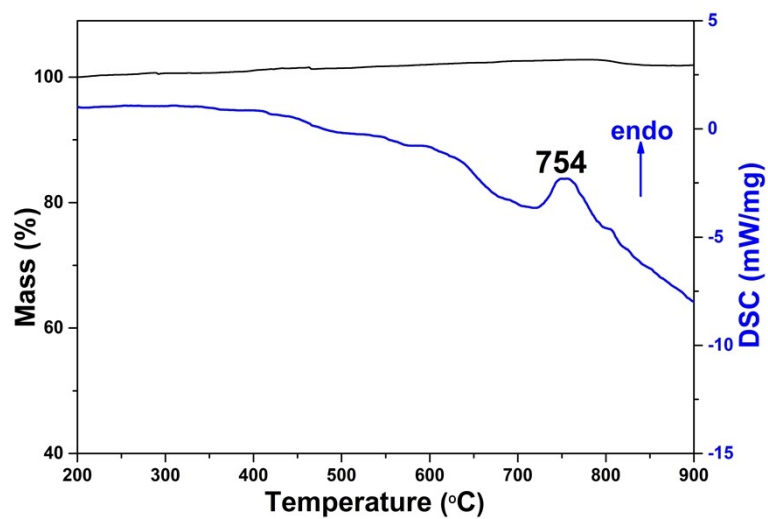

Fig. S4. The TG and DSC curves of  $[\text{Sr}_4\text{Cl}_2][\text{Si}_3\text{S}_9]$ .

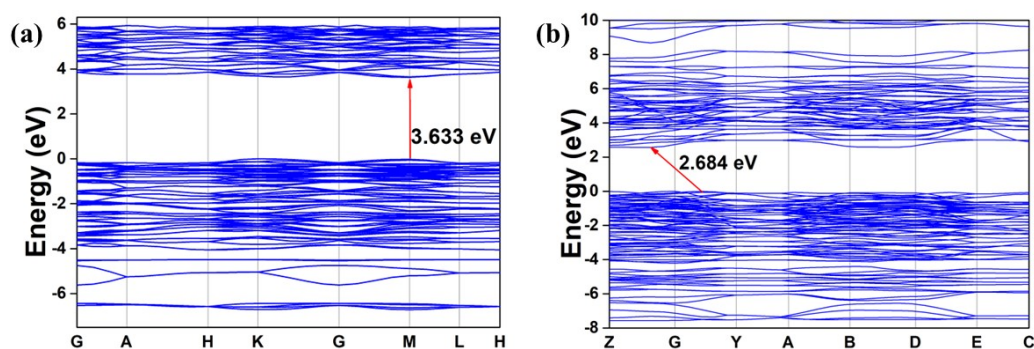

Fig. S5. Band structures of (a)  $[\text{Sr}_4\text{Cl}_2][\text{Si}_3\text{S}_9]$  and (b)  $\text{Sr}_2\text{SiS}_4$ .

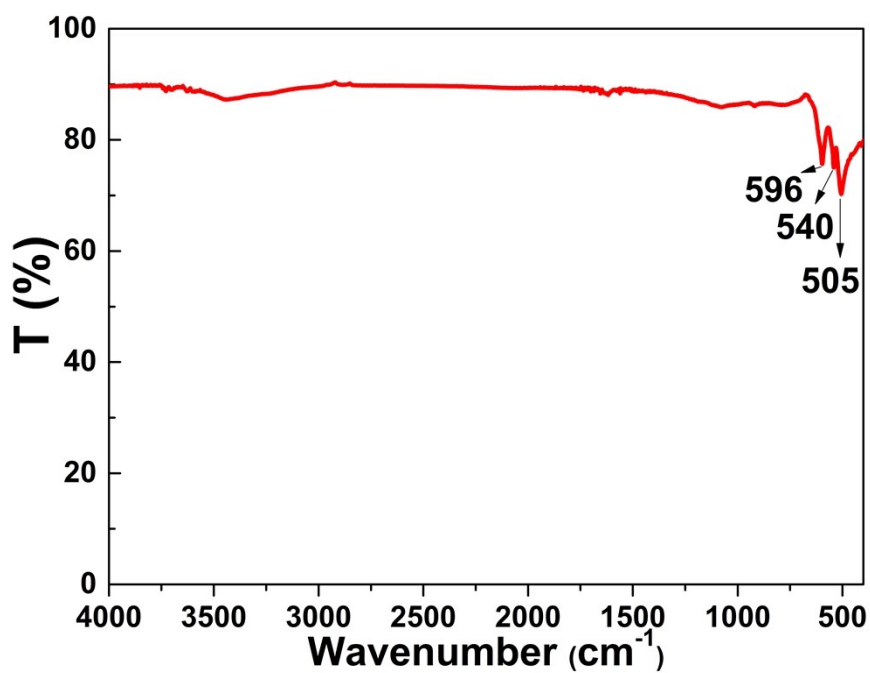

Fig. S6. IR spectrum of  $[\text{Sr}_4\text{Cl}_2][\text{Si}_3\text{S}_9]$ .



## 5. References

- [1] *SAINT*, version 7.60A; Bruker Analytical X-ray Instruments, Inc.: Madison, WI, 2008.
- [2] Sheldrick, G. M. *SHELXTL*, version 6.14; Bruker Analytical X-ray Instruments, Inc.: Madison, WI, 2003.
- [3] A. L. Spek, *J. Appl. Crystallogr.* 2003, **36**, 7.
- [4] S. K. Kurtz and T. T. Perry, *J. Appl. Phys.* 1968, **39**, 3798.
- [5] S. J. Clark, M. D. Segall, C. J. Pickard, P. J. Hasnip, M. J. Probert, K. Refson, M. C. Payne, *Z. Kristallogr.* 2005, **220**, 567.
- [6] J. P. Perdew, K. Burke, M. Ernzerhof, *Phys. Rev. Lett.* 1996, **77**, 3865.
- [7] A. M. Rappe, K. M. Rabe, E. Kaxiras, J. D. Joannopoulos, *Phys. Rev. B* 1990, **41**, 1227.
- [8] R. W. Godby, M. Schluter, L. J. Sham, *Phys. Rev. B: Condens. Matter Mater. Phys.* 1988, **37**, 10159.
- [9] B.W. Liu, X. M. Jiang, B. X. Li, H. Y. Zeng and G. C. Guo, *Angew. Chem. Int. Ed.*, 2020, **59**, 4856-4859.
- [10] B.W. Liu, H.Y. Zeng, X. M. Jiang and G.C. Guo, *CCS Chemistry*, 2020, **3**, 964-973.
- [11] H.Chen, Y.Y.Li, B. Li, P.-F. Liu, H. Lin, Q.L. Zhu and X.T. Wu, *Chem. Mater.*, 2020, **32**, 8012-8019.
- [12] W. Zhou, Z.H. Shi, W. Liu and S.P. Guo, *J. Alloys Compd.*, 2022, **895**, 162602.
- [13] B.W. Liu, H. Y. Zeng, X. M. Jiang, G. E. Wang, S. F. Li, L. Xu and G. C. Guo, *Chem. Sci.*, 2016, **7**, 6273-6277.
- [14] Y. Song, S. Cui, Z. Qian, H. Yu, Z. Hu, J. Wang, Y. Wu and H. Wu, *Inorg. Chem. Fron.*, 2022, **9**, 5932-5940.
- [15] K. Feng, L. Kang, Z. Lin, J. Yao and Y. Wu, *J. Mater. Chem. C*, 2014, **2**, 4590-4596.
- [16] B.W. Liu, X.M. Jiang, H.-Y. Zeng and G.-C. Guo, *J. Am. Chem. Soc.*, 2020, **142**, 10641-10645.
- [17] P. Yu, L.J. Zhou and L. Chen, *J. Am. Chem. Soc.*, 2012, **134**, 2227-2235.

- [18] S. M. Pei, B.W. Liu, X.M. Jiang, Y.Q. Zou, W.F. Chen, Q.N. Yan and G.C. Guo, *Chem. Mater.*, 2021, **33**, 8831-8837.
- [19] Y.Y. Li, P.F. Liu, L. Hu, L. Chen, H. Lin, L.J. Zhou and L.M. Wu, *Adv. Opt. Mater.*, 2015, **3**, 957-966.
- [20] W. Xing, C. Tang, N. Wang, C. Li, E. Uykur, J. Wu, Z. Lin, J. Yao, W. Yin and B. Kang, *Adv. Opt. Mater.*, 2021, **9**.
- [21] P. F. Liu, Y. Y. Li, Y. J. Zheng, J. S. Yu, R. H. Duan, H. Chen, H. Lin, L. Chen and L. M. Wu, *Dalton Trans.*, 2017, **46**, 2715-2721.
- [22] W. Xing, N. Wang, A. K. Iyer, W. Yin, Z. Lin, J. Yao, B. Kang and A. Mar, *J. Alloys Compd.*, 2020, **846**.
- [23] Y. Zhang, H. Wu, Z. Hu, J. Wang, Y. Wu and H. Yu, *Inorg. Chem. Fron.*, 2022, **9**, 4075-4080.
- [24] L. Gao, Y. Chu, X. Wu, B. Zhang and K. Wu, *Chem. Commun. (Camb.)*, 2021, **57**, 8218-8221.
- [25] S.M.Pei,L.T. Jiang,B.W. Liu and G.C. Guo, *J. Alloys Compd.*, 2022, **902**, 163656.
- [26] F. Lin, M. Luo, R. Wang, X. Che and F. Huang, *CrystEngComm*, 2021, **23**, 2133-2137.
- [27] L. Gao, X. Wu, D. Yang, X. Tian, J. Xu, B. Zhang and K. Wu, *Dalton Trans.*, 2021, **50**, 17901-17905.
- [28] Y. Yang, K. Wu, X. Wu, B. Zhang and L. Gao, *J. Mater. Chem. C*, 2020, **8**, 1762-1767.
- [29] G. Li, Y. Chu and Z. Zhou, *Chem. Mater.*, 2018, **30**, 602-606.
- [30] G.Li, Y. Chu, J. Li and Z.Zhou, *Dalton Trans.*, 2020, **49**, 1975-1980.
- [31] W. Yin, K. Feng, R. He, D. Mei, Z. Lin, J. Yao and Y. Wu, *Dalton Trans.*, 2012, **41**, 5653-5661.
- [32] W. Yin, K. Feng, W. Hao, J. Yao and Y. Wu, *Inorg. Chem.*, 2012, **51**, 5839-5843.
- [33] K. A. Rosmus, J. A. Brant, S. D. Wisneski, D. J. Clark, Y. S. Kim, J. I. Jang, C. D. Brunetta, J.-H. Zhang, M. N. Srncac and J. A. Aitken, *Inorg. Chem.*, 2014, **53**, 7809-7811.

- [34] K. Wu, Z. Yang and S. Pan, *Chem. Mater.*, 2016, **28**, 2795-2801.
- [35] J. Chen, C. Lin, S. Yang, X. Jiang, S. Shi, Y. Sun, B. Li, S. Fang and N. Ye, *Cryst. Growth Des.*, 2020, **20**, 2489-2496.
- [36] K. Wu and S. Pan, *Crystals*, 2017, **7**, 107.
- [37] S.F. Li, B.W. Liu, M.J. Zhang, Y.H. Fan, H.Y. Zeng and G.C. Guo, *Inorg. Chem.*, 2016, **55**, 1480-1485.
- [38] G. C. McKeown Wessler, T. Wang, J.-P. Sun, Y. Liao, M. C. Fischer, V. Blum and D. B. Mitzi, *Inorg. Chem.*, 2021, **60**, 12206-12217.
- [39] G. Akopov, G. Viswanathan, N. W. Hewage, P. Yox, K. Wu and K. Kovnir, *J. Alloys Compd.*, 2022, **902**, 163756.
